# Supplementary material for: Defined Nutrient Diets Alter Susceptibility to Clostridium difficile Associated Disease in a Murine Model
Source: PubMed Central journal article supplement (PMC4504475; doi:10.1371/journal.pone.0131829), 2015-07-16
Supplement: pone.0131829.s004.pdf [file pone.0131829.s004.pdf]

# TD.08679 2% Protein Diet

## Formula

| Formula                             | g/Kg   |
|-------------------------------------|--------|
| Casein                              | 23.0   |
| DL-Methionine                       | 0.4    |
| Sucrose                             | 150.0  |
| Corn Starch                         | 555.22 |
| Maltodextrin                        | 120.0  |
| Corn Oil                            | 54.4   |
| Cellulose                           | 50.0   |
| Vitamin Mix, Teklad (40060)         | 10.0   |
| Mineral Mix, Ca-P Deficient (79055) | 13.37  |
| Calcium Phosphate, dibasic          | 23.0   |
| Calcium Carbonate                   | 0.6    |
| Ethoxyquin, antioxidant             | 0.01   |

## Footnote

A 2% protein diet with 15% sucrose. Modified from TD.92203 (protein adjusted series) to reduce sucrose and increase starch.

## Selected Nutrient Information<sup>1</sup>

|              | % by weight | % kcal from |
|--------------|-------------|-------------|
| Protein      | 2.0         | 2.2         |
| Carbohydrate | 76.8        | 84.2        |
| Fat          | 5.5         | 13.6        |

**Kcal/g 3.6**

<sup>1</sup> Values are calculated from ingredient analysis or manufacturer data

*Teklad Diets are designed & manufactured for research purposes only.*

## Speak With A Nutritionist

- (800) 483-5523
- askanutritionist@harlan.com

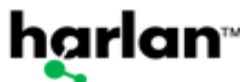

Harlan Laboratories · PO Box 44220 · Madison, WI 53744-4220

[www.harlan.com](http://www.harlan.com)

## Key Features

- Purified Diet
- Low Protein
- Malnutrition Model
- Rodent

## Key Planning Information

- Products are made fresh to order
- Store product at 4°C or lower
- Use within 6 months (applicable to most diets)
- Box labeled with product name, manufacturing date, and lot number
- Replace diet at minimum once per week  
*More frequent replacement may be advised*
- Lead time:
  - 2 weeks non-irradiated
  - 4 weeks irradiated

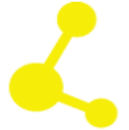

## Product Specific Information

- 1/2" Pellet or Powder (free flowing)
- Minimum order 3 Kg
- Irradiation available upon request

## Options (Fees Will Apply)

- Rush order (pending availability)
- Irradiation (see Product Specific Information)
- Vacuum packaging (1 and 2 Kg)

## International Inquiry

· Outside U.S.A. or Canada ·

- askanutritionist@harlan.com

## Place Your Order (U.S.A. & Canada)

· Place Order · Obtain Pricing ·  
· Check Order Status ·

- (800) 483-5523
- (608) 277-2066 *facsimile*
- tekladinfo@harlan.com

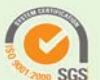

*Helping you do research better*
