# Supplementary material for: Defined Nutrient Diets Alter Susceptibility to Clostridium difficile Associated Disease in a Murine Model
Source: PubMed Central journal article supplement (PMC4504475; doi:10.1371/journal.pone.0131829), 2015-07-16
Supplement: pone.0131829.s006.pdf [file pone.0131829.s006.pdf]

**Product Description-** 7012 is a fixed formula, autoclavable diet manufactured with high quality ingredients and designed to support gestation, lactation, and growth of rodents. Typical isoflavone concentrations (daidzein + genistein aglycone equivalents) range from 300 to 600 mg/kg. Absence of animal protein and fish meal minimizes the presence of nitrosamines. 7012 is supplemented with additional vitamins to ensure nutritional adequacy after autoclaving. **Also available certified (7012C) and irradiated (7912).**

### Macronutrients

|                                       |               |            |
|---------------------------------------|---------------|------------|
| Crude Protein                         | %             | 19.1       |
| Fat (ether extract) <sup>a</sup>      | %             | 5.8        |
| Carbohydrate (available) <sup>b</sup> | %             | 44.3       |
| Crude Fiber                           | %             | 4.6        |
| Neutral Detergent Fiber <sup>c</sup>  | %             | 13.7       |
| Ash                                   | %             | 6.1        |
| Energy Density <sup>d</sup>           | kcal/g (kJ/g) | 3.1 (13.0) |
| Calories from Protein                 | %             | 25         |
| Calories from Fat                     | %             | 17         |
| Calories from Carbohydrate            | %             | 58         |

### Minerals

|                        |       |      |
|------------------------|-------|------|
| Calcium                | %     | 1.0  |
| Phosphorus             | %     | 0.7  |
| Non-Phytate Phosphorus | %     | 0.4  |
| Sodium                 | %     | 0.3  |
| Potassium              | %     | 0.8  |
| Chloride               | %     | 0.5  |
| Magnesium              | %     | 0.2  |
| Zinc                   | mg/kg | 63   |
| Manganese              | mg/kg | 93   |
| Copper                 | mg/kg | 23   |
| Iodine                 | mg/kg | 3    |
| Iron                   | mg/kg | 240  |
| Selenium               | mg/kg | 0.16 |

### Amino Acids

|               |   |     |
|---------------|---|-----|
| Aspartic Acid | % | 1.8 |
| Glutamic Acid | % | 2.8 |
| Alanine       | % | 1.0 |
| Glycine       | % | 0.8 |
| Threonine     | % | 0.8 |
| Proline       | % | 1.4 |
| Serine        | % | 1.3 |
| Leucine       | % | 1.7 |
| Isoleucine    | % | 0.8 |
| Valine        | % | 0.9 |
| Phenylalanine | % | 0.9 |
| Tyrosine      | % | 0.8 |
| Methionine    | % | 0.4 |
| Cystine       | % | 0.3 |
| Lysine        | % | 1.0 |
| Histidine     | % | 0.5 |
| Arginine      | % | 1.2 |
| Tryptophan    | % | 0.3 |

**Ingredients** (in descending order of inclusion)- Ground corn, dehulled soybean meal, ground oats, wheat middlings, dehydrated alfalfa meal, soybean oil, corn gluten meal, calcium carbonate, dicalcium phosphate, brewers dried yeast, iodized salt, choline chloride, kaolin, magnesium oxide, L-lysine, DL-methionine, locust bean gum, gelatin, ferrous sulfate, menadione sodium bisulfite complex (source of vitamin K activity), vitamin E acetate, thiamin mononitrate, calcium pantothenate, manganous oxide, niacin, copper sulfate, zinc oxide, vitamin A acetate, pyridoxine hydrochloride, riboflavin, vitamin D<sub>3</sub> supplement, vitamin B<sub>12</sub> supplement, folic acid, biotin, calcium iodate, cobalt carbonate.

### Standard Product Form: Pellet

### Vitamins

|                                          |       |      |
|------------------------------------------|-------|------|
| Vitamin A <sup>e, f</sup>                | IU/g  | 30.0 |
| Vitamin D <sub>3</sub> <sup>e, g</sup>   | IU/g  | 2.4  |
| Vitamin E                                | IU/kg | 150  |
| Vitamin K <sub>3</sub> (menadione)       | mg/kg | 80   |
| Vitamin B <sub>1</sub> (thiamin)         | mg/kg | 95   |
| Vitamin B <sub>2</sub> (riboflavin)      | mg/kg | 14   |
| Niacin (nicotinic acid)                  | mg/kg | 100  |
| Vitamin B <sub>6</sub> (pyridoxine)      | mg/kg | 17   |
| Pantothenic Acid                         | mg/kg | 87   |
| Vitamin B <sub>12</sub> (cyanocobalamin) | mg/kg | 0.09 |
| Biotin                                   | mg/kg | 0.77 |
| Folate                                   | mg/kg | 7    |
| Choline                                  | mg/kg | 2200 |

### Fatty Acids

|                       |   |     |
|-----------------------|---|-----|
| C16:0 Palmitic        | % | 0.6 |
| C18:0 Stearic         | % | 0.2 |
| C18:1ω9 Oleic         | % | 1.3 |
| C18:2ω6 Linoleic      | % | 2.6 |
| C18:3ω3 Linolenic     | % | 0.3 |
| Total Saturated       | % | 0.8 |
| Total Monounsaturated | % | 1.3 |
| Total Polyunsaturated | % | 2.9 |

### Other

|             |       |    |
|-------------|-------|----|
| Cholesterol | mg/kg | -- |
|-------------|-------|----|

<sup>a</sup> Ether extract is used to measure fat in pelleted diets, while an acid hydrolysis method is required to recover fat in extruded diets. Compared to ether extract, the fat value for acid hydrolysis will be approximately 1% point higher.

<sup>b</sup> Carbohydrate (available) is calculated by subtracting neutral detergent fiber from total carbohydrates.

<sup>c</sup> Neutral detergent fiber is an estimate of insoluble fiber, including cellulose, hemicellulose, and lignin. Crude fiber methodology underestimates total fiber.

<sup>d</sup> Energy density is a calculated estimate of *metabolizable energy* based on the Atwater factors assigning 4 kcal/g to protein, 9 kcal/g to fat, and 4 kcal/g to available carbohydrate.

<sup>e</sup> Indicates added amount but does not account for contribution from other ingredients.

<sup>f</sup> 1 IU vitamin A = 0.3 μg retinol

<sup>g</sup> 1 IU vitamin D = 25 ng cholecalciferol

For nutrients not listed, insufficient data is available to quantify.

Nutrient data represent the best information available, calculated from published values and direct analytical testing of raw materials and finished product. Nutrient values may vary due to the natural variations in the ingredients, analysis, and effects of processing.

**Teklad Diets are designed and manufactured for research purposes only.**

Harlan, Harlan Laboratories, Helping you do research better, and the Harlan logo are trademarks and trade names of Harlan Laboratories, Inc. © 2008 Harlan Laboratories, Inc.
