# Supplementary material for: Defined Nutrient Diets Alter Susceptibility to Clostridium difficile Associated Disease in a Murine Model
Source: PubMed Central journal article supplement (PMC4504475; doi:10.1371/journal.pone.0131829), 2015-07-16
Supplement: pone.0131829.s007.pdf [file pone.0131829.s007.pdf]

## D09051102 and D09081701

OpenStandard Diet With 20 kcal% Protein, 15 kcal% Fat and 65 kcal% Carbohydrate and Same with Reduced Protein, Calcium, Potassium, Sodium, Chloride, and Phosphorus

| Product #                             | D09051102           |             | D09081701             |             |
|---------------------------------------|---------------------|-------------|-----------------------|-------------|
|                                       | <i>Control Diet</i> |             | <i>Deficient Diet</i> |             |
|                                       | gm%                 | kcal%       | gm%                   | kcal%       |
| Protein                               | 19.0                | 20          | 6.5                   | 7           |
| Carbohydrate                          | 63.1                | 65          | 81.9                  | 88          |
| Fat                                   | 6.5                 | 15          | 2.1                   | 5           |
| Total                                 |                     | 100         |                       | 100         |
| kcal/gm                               | 3.77                |             | 3.77                  |             |
|                                       |                     |             |                       |             |
| Ingredient                            | gm                  | kcal        | gm                    | kcal        |
| Casein                                | 200                 | 800         | 71                    | 284         |
| L-Cystine                             | 3                   | 12          | 1.07                  | 4           |
|                                       |                     |             |                       |             |
| Corn Starch                           | 346                 | 1384        | 557                   | 2228        |
| Maltodextrin 10                       | 45                  | 180         | 70                    | 280         |
| Dextrose                              | 250                 | 1000        | 250                   | 1000        |
| Sucrose                               | 0                   | 0           | 2.41                  | 10          |
|                                       |                     |             |                       |             |
| Cellulose, BW200                      | 75                  | 0           | 75                    | 0           |
| Inulin                                | 25                  | 25          | 25                    | 25          |
|                                       |                     |             |                       |             |
| Soybean Oil                           | 70                  | 630         | 23.3                  | 210         |
|                                       |                     |             |                       |             |
| Mineral Mix S10026                    | 10                  | 0           | 0                     | 0           |
| Mineral Mix S10026A                   | 0                   | 0           | 5                     | 0           |
| Dicalcium Phosphate                   | 13                  | 0           | 11                    | 0           |
| Calcium Carbonate                     | 5.5                 | 0           | 0                     | 0           |
| Potassium Citrate, 1 H <sub>2</sub> O | 16.5                | 0           | 8.2                   | 0           |
| Sodium Chloride                       | 0                   | 0           | 1.9                   | 0           |
|                                       |                     |             |                       |             |
| Vitamin Mix V10001                    | 10                  | 40          | 10                    | 40          |
| Choline Bitartrate                    | 2                   | 0           | 2                     | 0           |
|                                       |                     |             |                       |             |
| Red Dye #40, FD&C                     | 0                   | 0           | 0.05                  | 0           |
| Blue Dye #1, FD&C                     | 0.025               | 0           | 0                     | 0           |
| Yellow Dye #5, FD&C                   | 0.025               | 0           | 0                     | 0           |
|                                       |                     |             |                       |             |
| <b>Total</b>                          | <b>1071.05</b>      | <b>4071</b> | <b>1112.93</b>        | <b>4081</b> |

Formulated by Research Diets, Inc.
